# Supplementary material
Source: MDPI journal article supplement (https://www.mdpi.com/1999-4907/13/9/1504)
Supplement: s1 [file s1]

Supplementary Materials

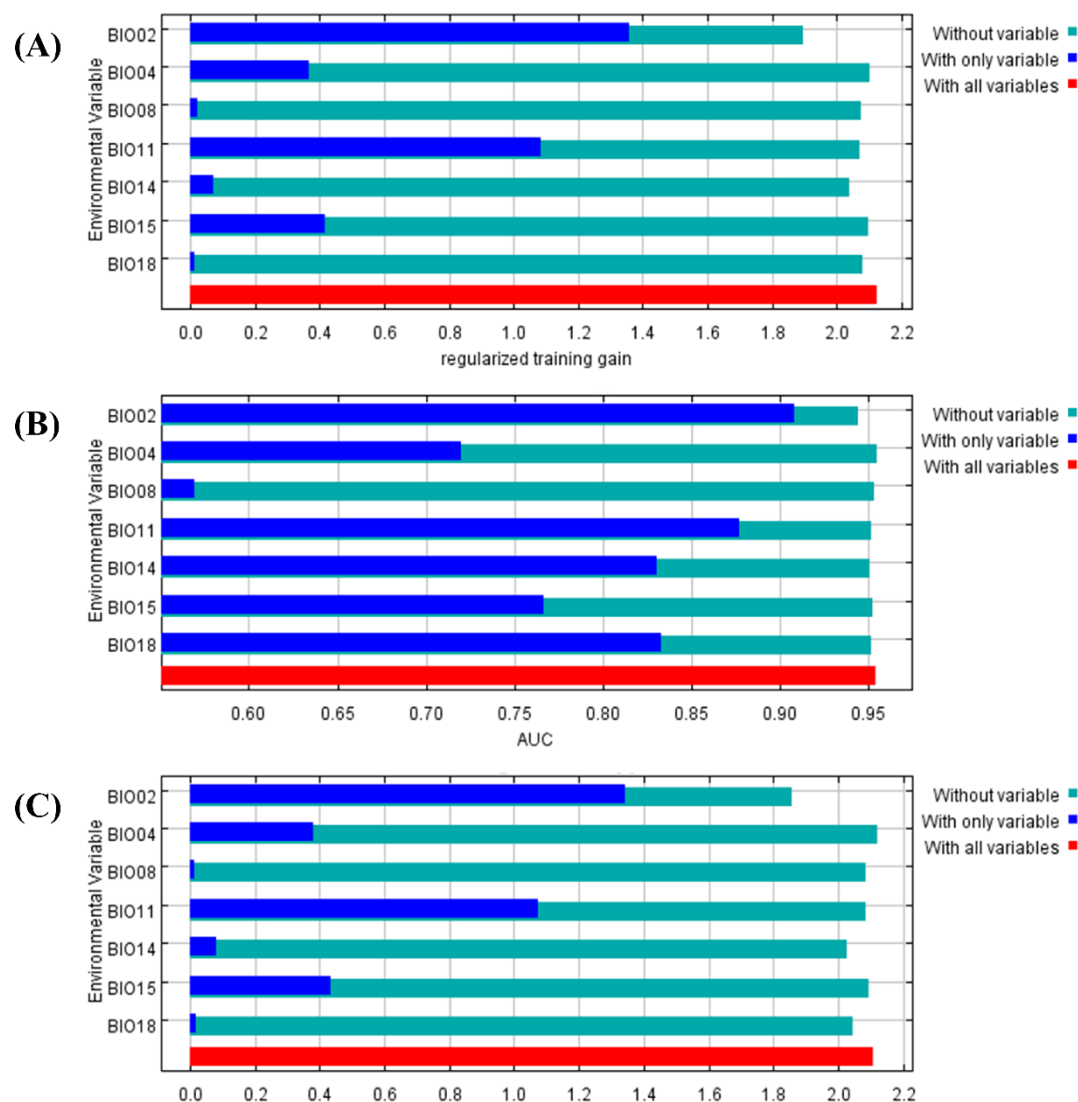

**Figure S1.** Jackknife test of the importance of variables. Blue, green, and red bars represent running the MaxEnt model with the variable alone, without the variable, and with all variables, respectively. (A): regularization training gain; (B): test gain; (C): AUC.

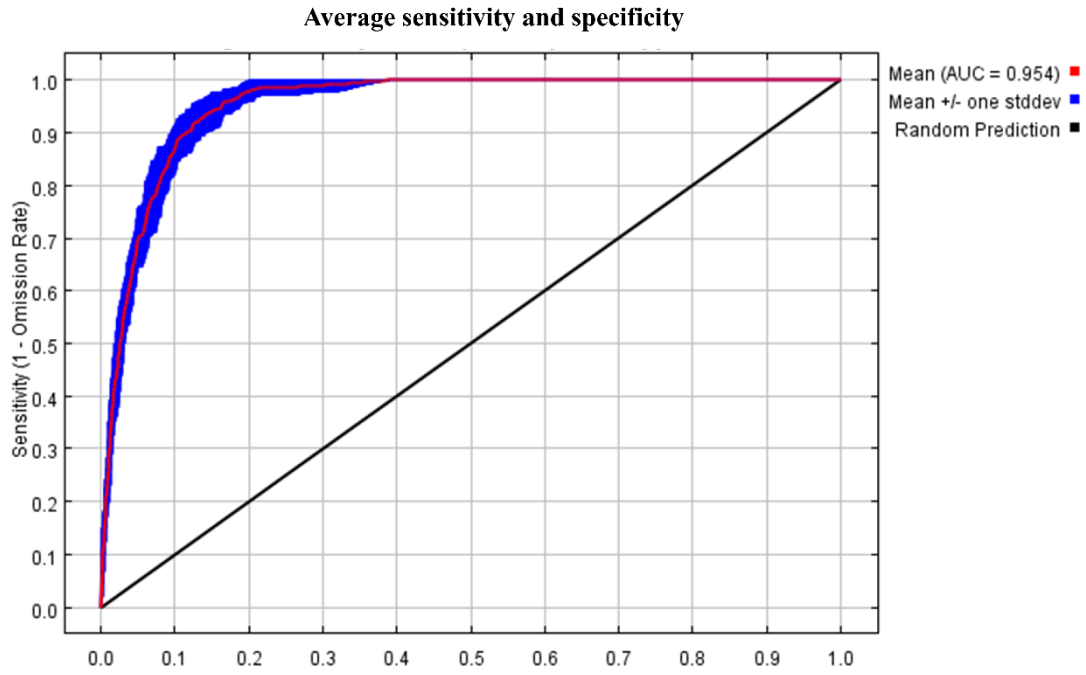

**Figure S2.** Response curves of seven environmental predictors used in the ecological niche model for *Cremastra appendiculata*.

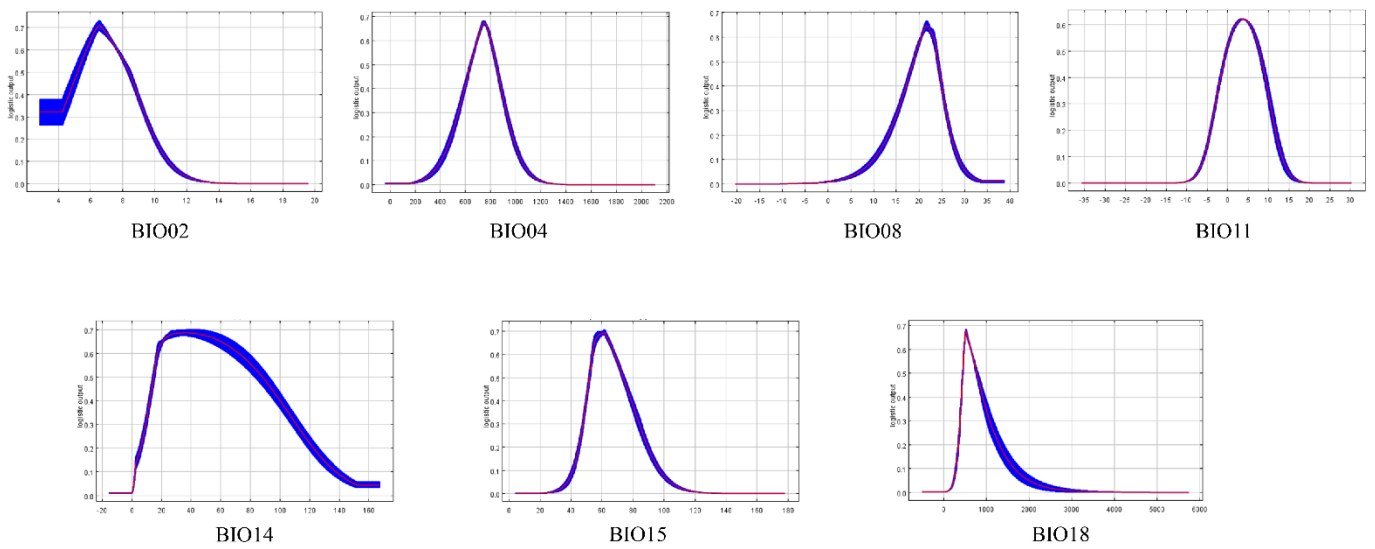

**Figure S3.** Prediction validation with receiver operator characteristic (ROC) curves using the MaxEnt model. AUC: the area under curve.

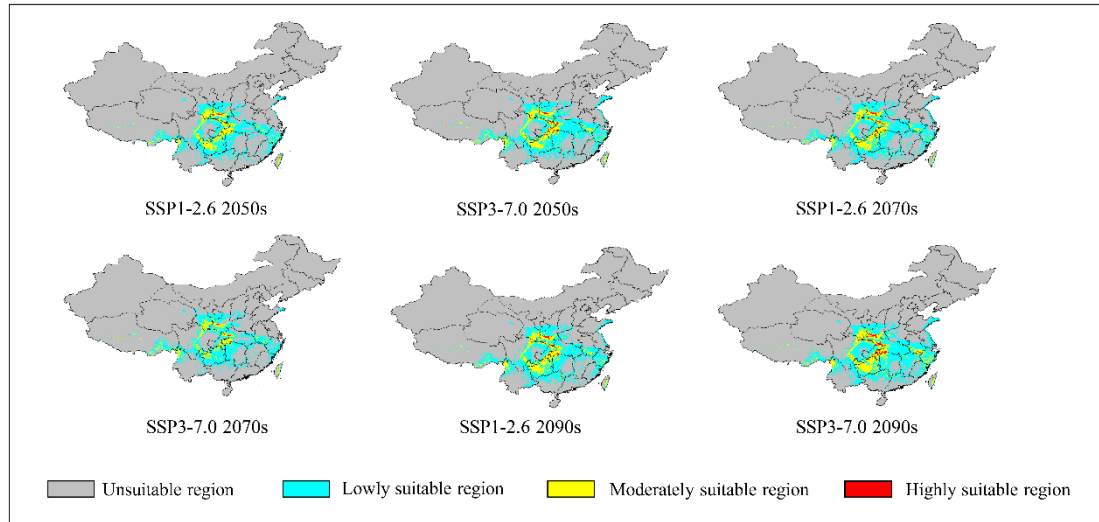

**Figure S4.** Predicted distribution of *Cremastra appendiculata* in China under future (2050s–2090s) climatic scenarios (SSP1-2.6 & SSP3-7.0).

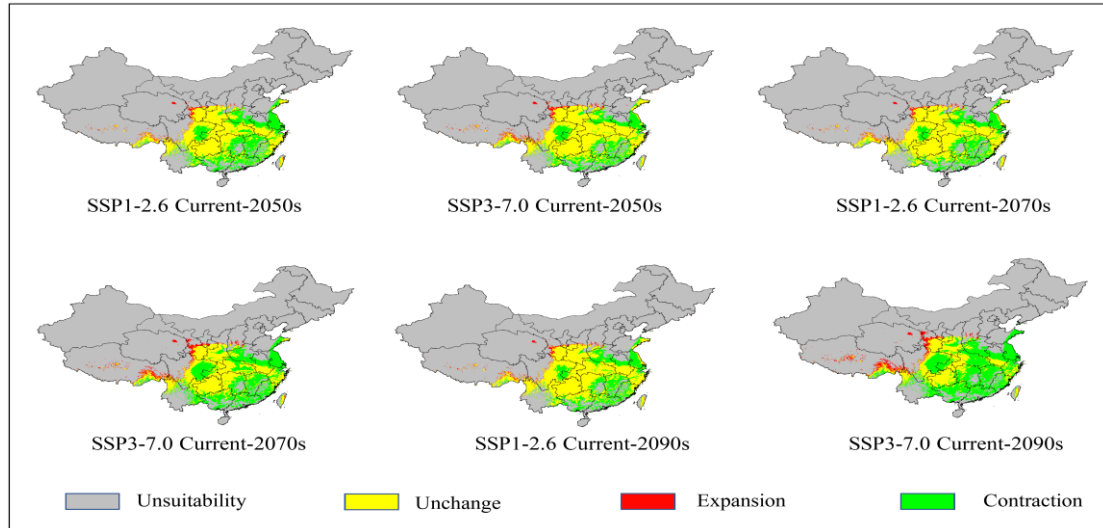

**Figure S5.** Changes of potential suitable areas of *Cremastra appendiculata* from current to future climatic conditions (SSP1-2.6 & SSP3-7.0).

**Table S1.** The rarefying data points (108) of *C. appendiculata* in China.

| Species                 | Lon*     | Lat*     | Species                 | Lon*     | Lat*     |
|-------------------------|----------|----------|-------------------------|----------|----------|
| <i>C. appendiculata</i> | 102.2708 | 29.89583 | <i>C. appendiculata</i> | 108.9792 | 23.47917 |
| <i>C. appendiculata</i> | 102.9375 | 23.0625  | <i>C. appendiculata</i> | 109.0625 | 32.27083 |
| <i>C. appendiculata</i> | 103.0625 | 27.10417 | <i>C. appendiculata</i> | 109.1875 | 25.39583 |
| <i>C. appendiculata</i> | 103.3542 | 29.5625  | <i>C. appendiculata</i> | 109.1875 | 26.39583 |
| <i>C. appendiculata</i> | 103.3958 | 29.5625  | <i>C. appendiculata</i> | 109.4375 | 29.47917 |
| <i>C. appendiculata</i> | 103.9792 | 28.22917 | <i>C. appendiculata</i> | 109.4375 | 32.35417 |
| <i>C. appendiculata</i> | 103.9792 | 28.60417 | <i>C. appendiculata</i> | 109.8125 | 29.22917 |
| <i>C. appendiculata</i> | 104.3542 | 33.60417 | <i>C. appendiculata</i> | 109.8125 | 29.6875  |
| <i>C. appendiculata</i> | 104.3958 | 33.52083 | <i>C. appendiculata</i> | 110.0208 | 29.6875  |
| <i>C. appendiculata</i> | 104.5625 | 33.3125  | <i>C. appendiculata</i> | 110.0625 | 26.39583 |
| <i>C. appendiculata</i> | 104.6042 | 26.52083 | <i>C. appendiculata</i> | 110.1042 | 26.39583 |
| <i>C. appendiculata</i> | 104.6042 | 32.89583 | <i>C. appendiculata</i> | 110.1458 | 24.97917 |
| <i>C. appendiculata</i> | 104.6458 | 32.89583 | <i>C. appendiculata</i> | 110.1875 | 28.8125  |
| <i>C. appendiculata</i> | 104.7708 | 32.72917 | <i>C. appendiculata</i> | 110.2292 | 30.85417 |
| <i>C. appendiculata</i> | 104.7708 | 32.77083 | <i>C. appendiculata</i> | 110.3958 | 31.39583 |

---

|                         |          |          |                         |          |          |
|-------------------------|----------|----------|-------------------------|----------|----------|
| <i>C. appendiculata</i> | 104.8125 | 32.72917 | <i>C. appendiculata</i> | 110.5208 | 34.85417 |
| <i>C. appendiculata</i> | 105.1875 | 28.10417 | <i>C. appendiculata</i> | 110.5625 | 31.5625  |
| <i>C. appendiculata</i> | 105.3958 | 27.3125  | <i>C. appendiculata</i> | 110.6875 | 31.77083 |
| <i>C. appendiculata</i> | 105.4375 | 27.0625  | <i>C. appendiculata</i> | 110.6875 | 36.4375  |
| <i>C. appendiculata</i> | 105.5625 | 27.52083 | <i>C. appendiculata</i> | 110.8542 | 28.85417 |
| <i>C. appendiculata</i> | 105.6458 | 24.97917 | <i>C. appendiculata</i> | 111.0625 | 26.39583 |
| <i>C. appendiculata</i> | 105.8125 | 23.3125  | <i>C. appendiculata</i> | 111.3958 | 35.02083 |
| <i>C. appendiculata</i> | 106.1458 | 23.35417 | <i>C. appendiculata</i> | 111.9375 | 33.52083 |
| <i>C. appendiculata</i> | 106.2292 | 28.35417 | <i>C. appendiculata</i> | 111.9375 | 36.72917 |
| <i>C. appendiculata</i> | 106.2292 | 33.02083 | <i>C. appendiculata</i> | 111.9792 | 36.89583 |
| <i>C. appendiculata</i> | 106.3958 | 28.52083 | <i>C. appendiculata</i> | 112.3958 | 24.77083 |
| <i>C. appendiculata</i> | 106.3958 | 28.60417 | <i>C. appendiculata</i> | 112.6875 | 27.3125  |
| <i>C. appendiculata</i> | 106.4375 | 28.47917 | <i>C. appendiculata</i> | 113.2708 | 24.77083 |
| <i>C. appendiculata</i> | 106.4792 | 24.85417 | <i>C. appendiculata</i> | 113.5625 | 35.5625  |
| <i>C. appendiculata</i> | 106.4792 | 35.64583 | <i>C. appendiculata</i> | 114.5625 | 24.6875  |
| <i>C. appendiculata</i> | 106.5625 | 26.52083 | <i>C. appendiculata</i> | 115.3542 | 26.3125  |
| <i>C. appendiculata</i> | 106.6458 | 26.14583 | <i>C. appendiculata</i> | 115.3542 | 31.8125  |
| <i>C. appendiculata</i> | 106.6875 | 34.72917 | <i>C. appendiculata</i> | 115.5625 | 29.3125  |
| <i>C. appendiculata</i> | 106.9792 | 29.27083 | <i>C. appendiculata</i> | 115.6875 | 30.72917 |
| <i>C. appendiculata</i> | 107.1042 | 29.0625  | <i>C. appendiculata</i> | 115.7708 | 31.14583 |
| <i>C. appendiculata</i> | 107.1458 | 29.0625  | <i>C. appendiculata</i> | 115.7708 | 31.1875  |
| <i>C. appendiculata</i> | 107.1875 | 24.97917 | <i>C. appendiculata</i> | 115.8958 | 31.47917 |
| <i>C. appendiculata</i> | 107.1875 | 28.22917 | <i>C. appendiculata</i> | 115.9375 | 29.52083 |
| <i>C. appendiculata</i> | 107.2708 | 28.9375  | <i>C. appendiculata</i> | 115.9792 | 29.47917 |
| <i>C. appendiculata</i> | 107.3125 | 29.0625  | <i>C. appendiculata</i> | 115.9792 | 29.52083 |
| <i>C. appendiculata</i> | 107.4375 | 29.14583 | <i>C. appendiculata</i> | 115.9792 | 29.60417 |
| <i>C. appendiculata</i> | 107.6042 | 29.3125  | <i>C. appendiculata</i> | 116.0208 | 29.5625  |
| <i>C. appendiculata</i> | 107.7292 | 29.3125  | <i>C. appendiculata</i> | 116.0208 | 30.72917 |
| <i>C. appendiculata</i> | 107.8125 | 26.0625  | <i>C. appendiculata</i> | 116.2708 | 31.10417 |
| <i>C. appendiculata</i> | 107.8958 | 29.10417 | <i>C. appendiculata</i> | 117.6042 | 29.5625  |
| <i>C. appendiculata</i> | 107.8958 | 29.22917 | <i>C. appendiculata</i> | 118.1875 | 30.14583 |
| <i>C. appendiculata</i> | 107.9792 | 26.5625  | <i>C. appendiculata</i> | 118.9375 | 31.89583 |
| <i>C. appendiculata</i> | 108.3542 | 29.77083 | <i>C. appendiculata</i> | 119.4375 | 30.3125  |
| <i>C. appendiculata</i> | 108.4375 | 29.14583 | <i>C. appendiculata</i> | 119.4375 | 30.35417 |
| <i>C. appendiculata</i> | 108.5208 | 27.64583 | <i>C. appendiculata</i> | 120.8125 | 23.52083 |
| <i>C. appendiculata</i> | 108.5208 | 31.89583 | <i>C. appendiculata</i> | 95.10417 | 30.10417 |
| <i>C. appendiculata</i> | 108.5208 | 32.89583 | <i>C. appendiculata</i> | 98.60417 | 24.47917 |
| <i>C. appendiculata</i> | 108.6875 | 27.9375  | <i>C. appendiculata</i> | 98.6875  | 27.72917 |
| <i>C. appendiculata</i> | 108.8125 | 28.0625  | <i>C. appendiculata</i> | 98.89583 | 26.77083 |

---
